# Supplementary material
Source: publisher figshare collection journal article supplement (https://asha.figshare.com/articles/dataset/_/25050290)
Supplement: Supplementary file 1 [file 1]

**Supplemental Material S1. PW CBM-W items.**

| Form A | Form B |
|--------|--------|
| Wash   | Ride   |
| School | Baby   |
| Mouse  | Legs   |
| Walk   | Drive  |
| Lamp   | Cat    |
| Pants  | Pan    |
| Cry    | Blow   |
| Box    | Flower |
| Sun    | Hat    |
| Hide   | Bake   |
| Horse  | Bug    |
| Fish   | Glass  |

*Note.* PW CBM-W = picture–word writing curriculum-based measure.  
Items are listed in the order in which they appear on PW CBM-W forms.
